# Supplementary material for: The Water Suitcase of Migrants: Assessing Virtual Water Fluxes Associated to Human Migration
Source: PLOS journal article supplement (doi:10.1371/journal.pone.0153982), 2016-04-28
Supplement: S4 (10.1371/journal.pone.0153982.s004) [file journal.pone.0153982.s004]

| Decade             | 1990      | 2000      | 2010      |
|--------------------|-----------|-----------|-----------|
| migration          | 0.099***  | 0.185***  | 0.305***  |
| weighted distance  | -0.748*** | -0.862*** | -0.881*** |
| population (o)     | 0.658***  | 0.836***  | 0.824***  |
| population (d)     | 0.729***  | 0.681***  | 0.658***  |
| per capita GDP (o) | 0.384***  | 0.486***  | 0.402***  |
| per capita GDP (d) | 0.650***  | 0.558***  | 0.370***  |
| contiguity         | 0.267**   | 0.297***  | 0.298***  |
| common language    | 0.168***  | 0.190***  | 0.263***  |
| colony             | 0.577***  | 0.469***  | 0.316 *** |
| common currency    | 0.440*    | -0.140    | 0.134     |
| rta                | 0.095     | 0.183***  | 0.282***  |
| tta (o)            | 0.315***  | 0.443***  | 0.258***  |
| tta (d)            | -0.090    | 0.003     | -0.188*** |
| N. observations    | 5959      | 8874      | 9261      |
| $R^2$ -adjusted    | 0.359     | 0.454     | 0.483     |
